# Supplementary material
Source: MDPI journal article supplement (https://www.mdpi.com/2304-6740/11/10/418)
Supplement: s1 [file s1]

## Supplementary information

# The Synthesis, crystal structure and magnetic properties of mono-scorpionate Eu(III) complexes

Kira E. Vostrikova\*, Taisiya S. Sukhikh and Alexander N. Lavrov

**Table S1.** Crystal data and structure refinement for the compounds.

| Identification code                                          | (1)                                                                          | (1a)                                                                         | (2)                                                                          | (3)                                                                                                                       |
|--------------------------------------------------------------|------------------------------------------------------------------------------|------------------------------------------------------------------------------|------------------------------------------------------------------------------|---------------------------------------------------------------------------------------------------------------------------|
| Empirical formula                                            | C <sub>14</sub> H <sub>18</sub> EuN <sub>11</sub> O <sub>10</sub>            | C <sub>10</sub> H <sub>12</sub> EuN <sub>9</sub> O <sub>10</sub>             | C <sub>18</sub> H <sub>25</sub> EuN <sub>10</sub> O <sub>9</sub>             | C <sub>32.9</sub> H <sub>37.24</sub> Eu <sub>2</sub> F <sub>18</sub> N <sub>14</sub> O <sub>20.73</sub><br>S <sub>6</sub> |
| Formula weight                                               | 652.35                                                                       | 570.25                                                                       | 677.44                                                                       | 1798.66                                                                                                                   |
| Temperature/K                                                | 150(2)                                                                       | 150(2)                                                                       | 150(2)                                                                       | 150(2)                                                                                                                    |
| Space group                                                  | <i>P</i> -1                                                                  | <i>I</i> 2/ <i>c</i>                                                         | <i>P</i> 2 <sub>1</sub> / <i>n</i>                                           | <i>P</i> 2 <sub>1</sub> / <i>c</i>                                                                                        |
| <i>a</i> /Å                                                  | 9.4083(2)                                                                    | 14.9027(3)                                                                   | 10.8259(6)                                                                   | 21.596(3)                                                                                                                 |
| <i>b</i> /Å                                                  | 11.0349(3)                                                                   | 15.6143(3)                                                                   | 14.9846(7)                                                                   | 17.912(2)                                                                                                                 |
| <i>c</i> /Å                                                  | 11.7157(3)                                                                   | 16.1279(4)                                                                   | 16.4034(8)                                                                   | 18.668(2)                                                                                                                 |
| $\alpha$ /°                                                  | 99.6960(10)                                                                  | 90                                                                           | 90                                                                           | 90                                                                                                                        |
| $\beta$ /°                                                   | 93.4410(10)                                                                  | 108.4710(10)                                                                 | 95.786(2)                                                                    | 115.419(4)                                                                                                                |
| $\gamma$ /°                                                  | 102.6850(10)                                                                 | 90                                                                           | 90                                                                           | 90                                                                                                                        |
| Volume/Å <sup>3</sup>                                        | 1163.71(5)                                                                   | 3559.55(13)                                                                  | 2647.4(2)                                                                    | 6522.3(14)                                                                                                                |
| <i>Z</i>                                                     | 2                                                                            | 8                                                                            | 4                                                                            | 4                                                                                                                         |
| $\rho_{\text{calc}}$ /cm <sup>3</sup>                        | 1.862                                                                        | 2.128                                                                        | 1.700                                                                        | 1.832                                                                                                                     |
| $\mu$ /mm <sup>-1</sup>                                      | 2.769                                                                        | 3.601                                                                        | 2.434                                                                        | 2.224                                                                                                                     |
| <i>F</i> (000)                                               | 644.0                                                                        | 2224.0                                                                       | 1352.0                                                                       | 3530.0                                                                                                                    |
| Crystal size/mm <sup>3</sup>                                 | 0.16 × 0.15 × 0.10                                                           | 0.20 × 0.16 × 0.08                                                           | 0.10 × 0.10 × 0.08                                                           | 0.12 × 0.10 × 0.03                                                                                                        |
| Radiation                                                    | MoK $\alpha$ ( $\lambda$ = 0.71073)                                                                                       |
| 2 $\theta$ range for data collection/°                       | 5.168 to 59.232                                                              | 3.886 to 61.058                                                              | 4.316 to 61.048                                                              | 3.086 to 51.484                                                                                                           |
| Index ranges                                                 | -13 ≤ <i>h</i> ≤ 13, -15 ≤ <i>k</i> ≤ 15, -16 ≤ <i>l</i> ≤ 16                | -21 ≤ <i>h</i> ≤ 21, -22 ≤ <i>k</i> ≤ 22, -22 ≤ <i>l</i> ≤ 22                | -13 ≤ <i>h</i> ≤ 15, -21 ≤ <i>k</i> ≤ 21, -23 ≤ <i>l</i> ≤ 22                |                                                                                                                           |
| Reflections collected                                        | 26611                                                                        | 44683                                                                        | 36783                                                                        |                                                                                                                           |
| Independent reflections                                      | 6515 [ <i>R</i> <sub>int</sub> = 0.0256, <i>R</i> <sub>sigma</sub> = 0.0220] | 5332 [ <i>R</i> <sub>int</sub> = 0.0308, <i>R</i> <sub>sigma</sub> = 0.0207] | 8022 [ <i>R</i> <sub>int</sub> = 0.0473, <i>R</i> <sub>sigma</sub> = 0.0393] | 5332 [ <i>R</i> <sub>int</sub> = 0.0308, <i>R</i> <sub>sigma</sub> = 0.0207]                                              |
| Data/restraints/parameters                                   | 6515/3/333                                                                   | 5332/2/277                                                                   | 8022/0/350                                                                   | 5332/2/277                                                                                                                |
| Goodness-of-fit on <i>F</i> <sup>2</sup>                     | 1.062                                                                        | 1.091                                                                        | 1.072                                                                        | 1.091                                                                                                                     |
| Final <i>R</i> indexes [ <i>I</i> > 2 $\sigma$ ( <i>I</i> )] | <i>R</i> <sub>1</sub> = 0.0151, <i>wR</i> <sub>2</sub> = 0.0357              | <i>R</i> <sub>1</sub> = 0.0184, <i>wR</i> <sub>2</sub> = 0.0370              | <i>R</i> <sub>1</sub> = 0.0276, <i>wR</i> <sub>2</sub> = 0.0525              | <i>R</i> <sub>1</sub> = 0.0184, <i>wR</i> <sub>2</sub> = 0.0370                                                           |
| Final <i>R</i> indexes [all data]                            | <i>R</i> <sub>1</sub> = 0.0156, <i>wR</i> <sub>2</sub> = 0.0360              | <i>R</i> <sub>1</sub> = 0.0281, <i>wR</i> <sub>2</sub> = 0.0414              | <i>R</i> <sub>1</sub> = 0.0354, <i>wR</i> <sub>2</sub> = 0.0581              | <i>R</i> <sub>1</sub> = 0.0281, <i>wR</i> <sub>2</sub> = 0.0414                                                           |
| Largest diff. peak/hole/e Å <sup>-3</sup>                    | 0.42/-0.55                                                                   | 0.55/-0.84                                                                   | 0.52/-0.62                                                                   | 0.55/-0.84                                                                                                                |

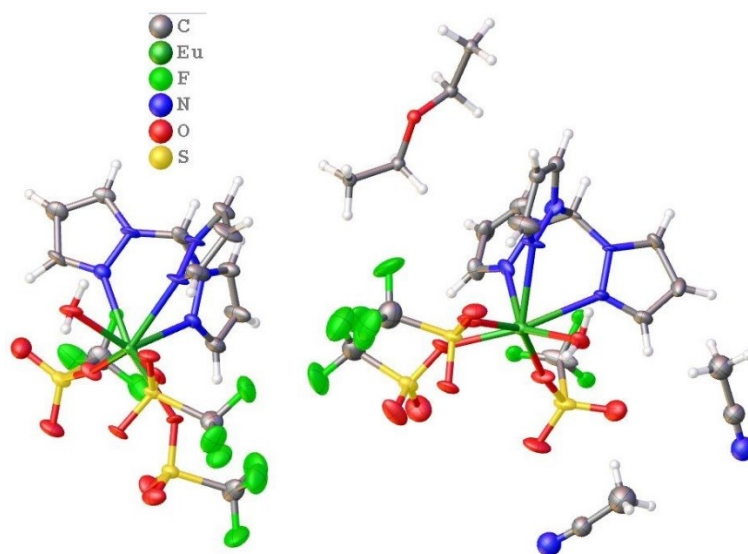

**Figure S1.** The asymmetric unit in the crystal structure of [Eu(HCPz<sub>3</sub>)H<sub>2</sub>O(CF<sub>3</sub>SO<sub>3</sub>)<sub>3</sub>]<sub>2</sub> (3).

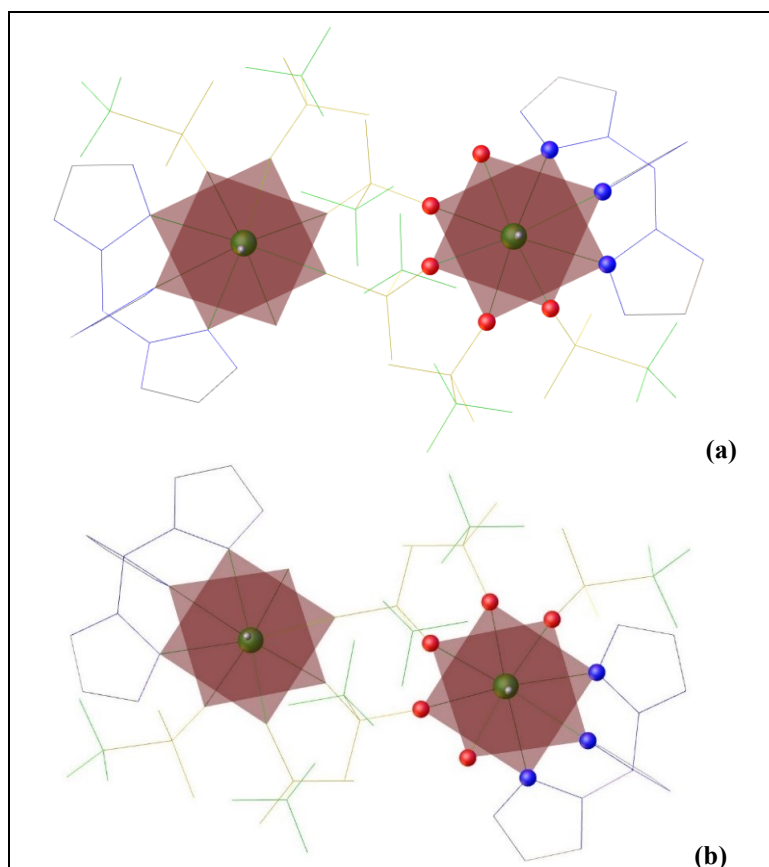

**Figure S2.** Square antiprism coordination environment - of  $\text{Eu}^{3+}$  sites in  $[\text{Eu}(\text{HCPz3})\text{H}_2\text{O}(\text{CF}_3\text{SO}_3)_3]_2$  (**3**) for: (a) around Eu1 central atom; (b) around Eu2 central atom.

**Table S2.** Geometry analysis of the complexes by SHAPE software.

| Compound                                                                    | CN                  | Polyhedron geometry                                 |                                                    |                                             |
|-----------------------------------------------------------------------------|---------------------|-----------------------------------------------------|----------------------------------------------------|---------------------------------------------|
| $[\text{Eu}(\text{HCPz3})(\text{NO}_3)_3\text{H}_2\text{O}]$ <b>1</b>       | [ML <sub>10</sub> ] | Sphenocorona, $\text{C}_{2v}$                       | Bicapped square antiprism, $\text{D}_{4d}$         |                                             |
|                                                                             |                     | 3.534                                               | 6.356                                              |                                             |
| $[\text{Eu}(\text{HCPz3})(\text{NO}_3)_3\text{H}_2\text{O}]$ <b>1a</b>      | [ML <sub>10</sub> ] | Sphenocorona, $\text{C}_{2v}$                       | Bicapped square antiprism, $\text{D}_{4d}$         |                                             |
|                                                                             |                     | 3.225                                               | 4.793                                              |                                             |
| $[\text{Eu}(\text{HC}(\text{Pz}^{\text{Me}_2})_3)(\text{NO}_3)_3]$ <b>2</b> | [ML <sub>9</sub> ]  | Spherical tricapped trigonal prism, $\text{D}_{3h}$ | Spherical capped square antiprism, $\text{C}_{4v}$ | Muffin, $\text{C}_s$                        |
| $[\text{Dy}(\text{Rad})(\text{NO}_3)_3]$                                    |                     | 2.05                                                | 2.910                                              | 3.027                                       |
| $[\text{Eu}(\text{HCPz3})\text{H}_2\text{O}(\text{OTf})_3]$ <b>3</b>        |                     | 2.220                                               | 3.025                                              | 3.256                                       |
| Eu01                                                                        | [ML <sub>8</sub> ]  | Square antiprism $\text{D}_{4d}$                    | Triangular dodecahedron, $\text{D}_{2d}$           | Biaugmented trigonal prism, $\text{C}_{2v}$ |
|                                                                             |                     | 0.354                                               | 2.184                                              | 1.543                                       |
| Eu02                                                                        | [ML <sub>8</sub> ]  | Square antiprism $\text{D}_{4d}$                    | Triangular dodecahedron, $\text{D}_{2d}$           | Biaugmented trigonal prism, $\text{C}_{2v}$ |
|                                                                             |                     | 0.426                                               | 1.919                                              | 1.368                                       |

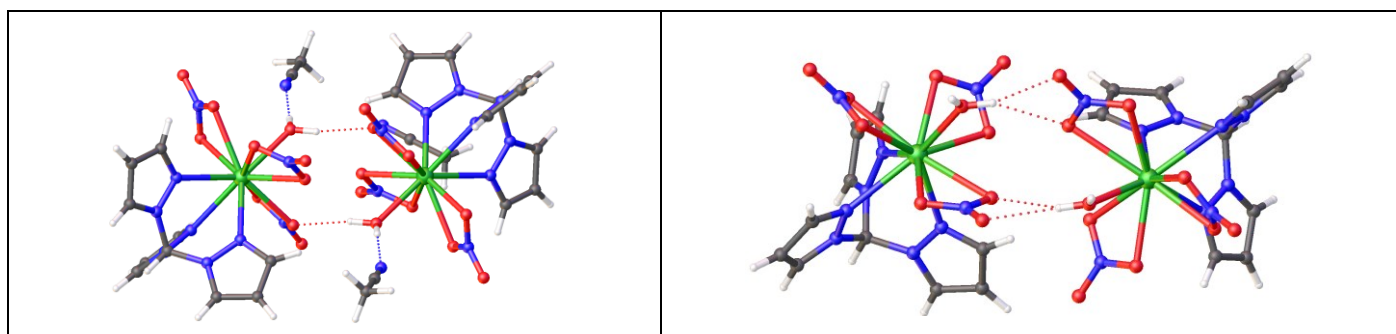

**Figure S3.** Dimerized species in **1** (left) and **1a** (right).

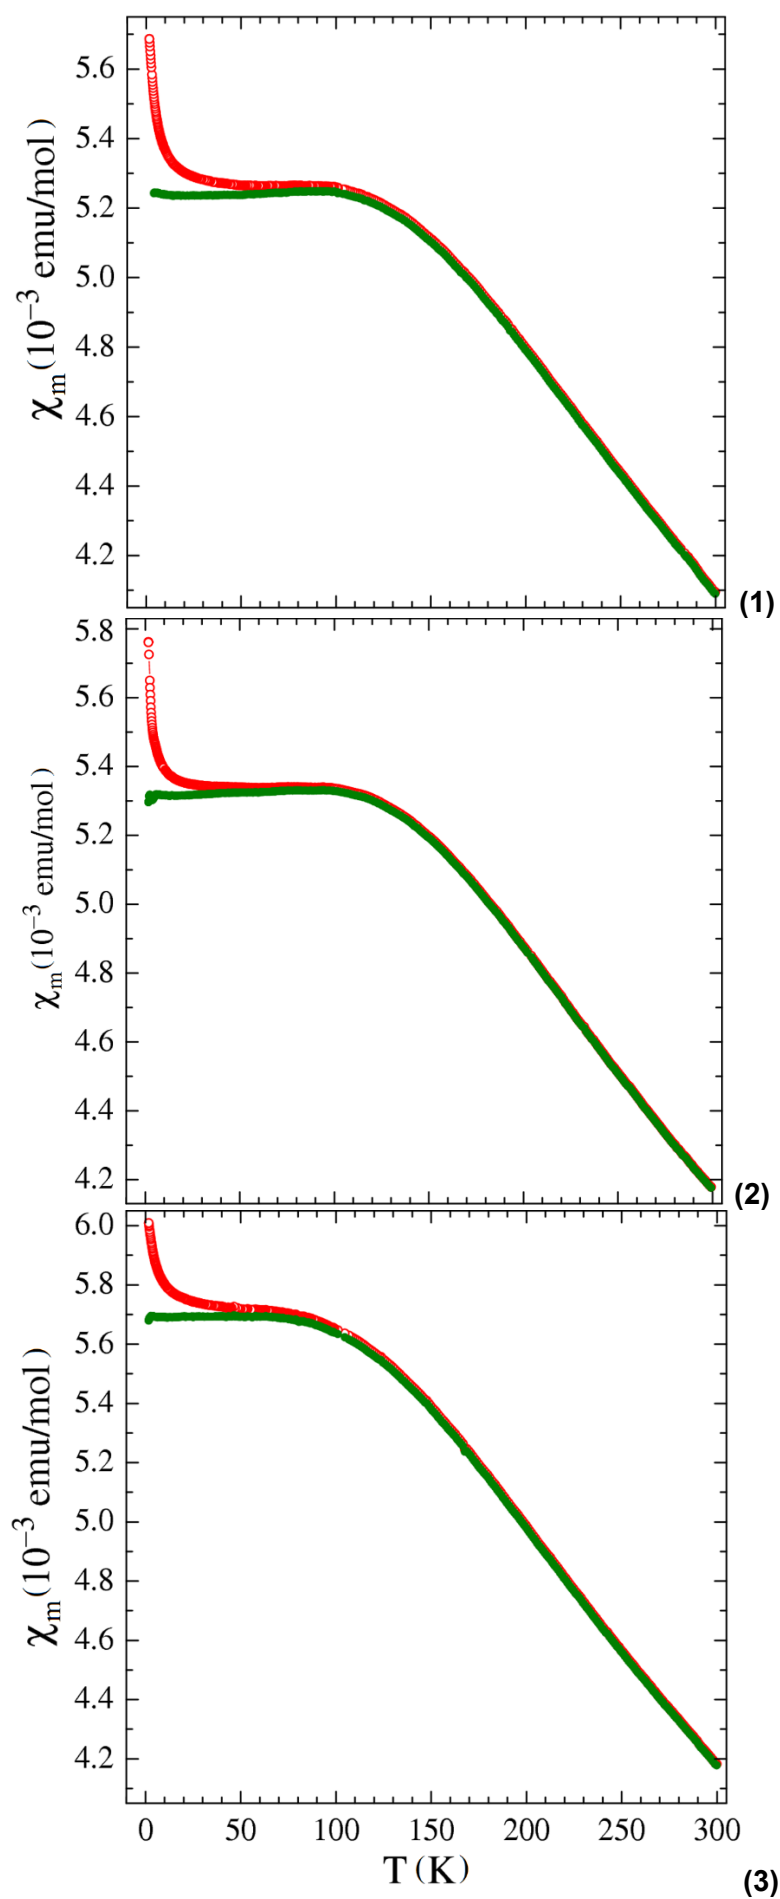

**Figure S4.** The temperature-dependent molar magnetic susceptibility  $\chi_M$  of **1–3** at a field of 1 kOe (open red circles). Solid green circles show the  $\chi_M$  data after subtraction of the contribution from Eu(II) impurities (0.01-0.017 %).
